# Supplementary material for: A Randomized Placebo Controlled Trial of Ibuprofen for Respiratory Syncytial Virus Infection in a Bovine Model
Source: PLoS One. 2016 Apr 13;11(4):e0152913. doi: 10.1371/journal.pone.0152913 (PMC4830518; doi:10.1371/journal.pone.0152913)
Supplement: S3 Table — Complete results of lipids measured in lymph nodes. (XLSX) [file pone.0152913.s007.xlsx]

## Sheet: Lymph COX, LOX and ROS 
	Lymph Tissue Peroxidation-Associated Metabolite Profiles
	Tissue	Bronchial Lymph					Mediastinal Lymph
	Treatment	Ibuprofen (n=5)	Control (n=6)	p	VIP		Ibuprofen (n=8)	Control (n=8)	p	VIP
	COX Metabolism
	6-keto PGF1a	1.72 (1.145 - 3.52)	26.1 (12.8 - 52.2)	‡	2.87115		5.27 (2.07 - 9.03)	115 (58.6 - 183)	‡	2.92192
	TXB2	5.31 (1.72 - 11)	113 (40.4 - 404)	‡	2.80235		14.8 (4.45 - 46.9)	473 (232 - 688)	‡	2.83383
	PGE1	0.636 (0.224 - 1.6)	23.8 (13.8 - 37.4)	‡	2.91624		2.57 (0.265 - 11)	111 (65.7 - 180)	‡	2.82953
	PGE2	11.5 (4.71 - 35.1)	295 (185 - 407)	‡	2.9071		58.4 (7.38 - 243)	1560 (1210 - 2210)	‡	2.69265
	15-Keto PGE2	0.14 (0.1175 - 0.242)	0.259 (0.1175 - 0.454)	†	1.87527		0.198 (0.118 - 0.686)	2.39 (1.68 - 4.26)	‡	2.66684
	PGD2	0.573 (0.5725 - 0.5725)	34 (20.2 - 63.3)	‡	2.69581		2.62 (0.81 - 43.3)	258 (146 - 361)	‡	2.79756
	15-deoxy PGJ2	0.264 (0.264 - 0.264)	0.568 (0.264 - 0.748)	---	2.55873		0.293 (0.23 - 0.799)	4.86 (1.27 - 8.85)	‡	2.78876
	PGF2a - Select	0.573 (0.5725 - 0.5725)	13.3 (9.71 - 22.5)	‡	2.78513		2.81 (1.325 - 8.54)	75.4 (47.3 - 93.5)	‡	2.89969
	11-HETE	11.1 (4.84 - 20.2)	24.9 (14.7 - 43.1)	‡	2.22007		20.2 (8.04 - 41.9)	86.2 (69.5 - 109)	‡	2.8075
	9-HODE	131 (73 - 185)	196 (95.8 - 249)	‡	1.95058		133 (79.3 - 219)	589 (311 - 1000)	‡	2.66598
	9-HOTE	5.93 (1.39 - 40.3)	2.82 (1.19 - 5.7)	---	1.24831		1.98 (1.26 - 3.09)	1.98 (1.21 - 3.17)	---	0.195453
	9-KODE	312 (139 - 924)	195 (112.8 - 343)	+	1.33089		---	---	---	---
	12/15-LOX Metabolism
	15-HETE	16.1 (5.57 - 29.8)	21.9 (12.8 - 45.7)	---	1.00261		26.9 (9.06 - 53.6)	63.3 (36.8 - 92.7)	‡	2.18014
	12-HETE	24 (8.27 - 66.4)	49.7 (5.65 - 408)	---	1.14302		45.5 (35.1 - 69.4)	237 (31.4 - 2240)	†	1.86778
	12-HEPE	0.539 (0.328 - 0.841)	1.33 (0.338 - 6.13)	†	1.70713		0.858 (0.229 - 1.7)	4.34 (0.515 - 29.4)	†	1.75795
	13-HODE	175 (90.9 - 251)	173 (85.6 - 238)	---	0.39408		176 (95.1 - 300)	317 (162 - 541)	†	1.84089
	13-HOTE	25.5 (7.3 - 132)	11 (4.28 - 17.9)	†	1.54039		8.58 (2.84 - 17.9)	9.51 (4.42 - 30)	---	0.428993
	13-KODE	140 (46.9 - 576.82)	62.2 (11.9 - 194)	+	1.36154		50.6 (27.3 - 97.6)	39.2 (23.7 - 66.7)	---	1.19192
	5-LOX Metabolism
	5-HETE	12.5 (6.72 - 20.1)	12.2 (9.04 - 17.4)	---	0.654525		22.9 (9.07 - 58.4)	35 (24.8 - 60.2)	---	0.956777
	5-HEPE	3.09 (1.36 - 6.97)	2.46 (0.597 - 10.6)	---	0.383192		1.23 (0.1625 - 7.26)	1.35 (0.325 - 3.11)	---	0.772289
	5-KETE	5.01 (2.7 - 8.59)	5.44 (2.94 - 12.4)	---	0.425925		7.05 (1.21 - 23.4)	7.43 (4.96 - 12.5)	---	0.540538
	ROS and Other LOX Products
	9,12,13-TriHOME	18.5 (10.9 - 31.5)	18.3 (10.1 - 29.7)	---	0.470424		22.6 (11.6 - 44.2)	23.4 (15.2 - 42.4)	---	0.313212
	9-HETE	5.77 (1.99 - 10.4)	4.82 (2.81 - 6.38)	---	1.22826		8.51 (3.23 - 20.1)	10.5 (8.14 - 15.8)	---	0.594162
	8-HETE	6.68 (2.92 - 13)	6.36 (4.725 - 7.46)	---	0.625105		8.88 (3.86 - 15.2)	10.3 (7.96 - 12.5)	---	0.727778
	Results are reported as Geometric Means (Ranges). Mean differences were determined by 2-tailed t-tests after transformation to normality. Differences are indicated at p<0.1 (+), p<0.05 †), p<0.01 (‡). Variable Importance in Projections (VIP) Scores are provided from the PLS-DA analysis using all clinical, cytokine, lymph mediator and plasma mediator results.

## Sheet: Lymph CYP Metab
	Lymph Tissue Epoxygenase-Associated Metabolite Concentrations (pmol/gr tissue)
		Bronchial Lymph					Mediastinal Lymph
	Treatment	Ibuprofen (n=5)	Control (n=6)	p	VIP		Ibuprofen (n=8)	Control (n=8)	p	VIP
	CYP Metabolism
	12(13)-EpOME	43.4 (9.13 - 264)	20.4 (9.2 - 47.4)	---	1.3134		16.7 (7.96 - 22.981)	14.3 (7.78 - 40.3)	---	0.146424
	9(10)-EpOME	24.6 (5.59 - 128)	15.1 (2.98 - 57)	---	0.912108		15 (6.47 - 23.5)	12.9 (6.63 - 37.276)	---	0.250845
	14(15)-EpETrE	7.6 (1.5 - 38)	5.66 (1.1 - 24.5)	---	0.479336		5.47 (0.749 - 13.4)	6.49 (3.1 - 27)	---	0.415121
	11(12)-EpETrE	8.34 (2.03 - 40)	5.31 (1.24 - 30.4)	---	0.722068		5.44 (1.11 - 14.9)	5.03 (2.57 - 14.6)	---	0.600954
	8(9)-EpETrE	22.1 (1.4 - 124)	8.2 (0.669 - 41.8)	+	1.29874		6.63 (1.34 - 18.6)	6.18 (1.29 - 24)	---	0.392883
	20-HETE	3.82 (0.9 - 9.31)	6.01 (3.46 - 12.4)	---	1.0121		6.5 (1.575 - 13.9)	2.9 (1.575 - 11.8)	+	1.36047
	sEH Metabolites
	12,13-DiHOME	0.147 (0.0983 - 0.202)	0.0959 (0.0401 - 0.145)	‡	1.90514		0.145 (0.0832 - 0.976)	0.0973 (0.0767 - 0.14)	---	0.904343
	9,10-DiHOME	3.81 (2.75 - 4.96)	2.94 (1.23 - 4.3)	+	1.33042		3.76 (2.15 - 13.1)	3.08 (2.43 - 3.96)	---	0.885976
	14,15-DiHETrE	1.23 (1.09 - 1.42)	1.13 (0.687 - 1.62)	---	0.380607		1.33 (0.931 - 2.15)	1.31 (0.835 - 1.98)	---	0.575804
	11,12-DiHETrE	0.817 (0.697 - 0.939)	0.925 (0.482 - 1.68)	---	0.959514		1.01 (0.645 - 1.41)	0.981 (0.711 - 1.19)	---	0.675224
	8,9-DiHETrE	0.535 (0.322 - 0.777)	0.727 (0.436 - 1.38)	---	1.30709		0.899 (0.246 - 1.25)	0.957 (0.559 - 1.45)	---	0.146116
	5,6-DiHETrE	0.327 (0.0677 - 0.535)	0.276 (0.0955 - 0.691)	---	0.591215		0.642 (0.192 - 1.04)	0.408 (0.157 - 0.859)	+	1.34765
	17,18-DiHETE	2.92 (0.613 - 7.23)	3.81 (0.3065 - 6.6)	---	1.16745		1.53 (0.2695 - 3.12)	1.75 (0.2695 - 6.36)	---	0.727138
	19,20-DiHDoPA	0.643 (0.444 - 0.969)	0.578 (0.222 - 0.915)	---	0.463425		---	---	---	---
	Results are reported as Geometric Means (Ranges). Mean differences were determined by 2-tailed t-tests after transformation to normality. Differences are indicated at p<0.1 (+), p<0.05 †), p<0.01 (‡). Variable Importance in Projections (VIP) Scores are provided from the PLS-DA analysis using all clinical, cytokine, lymph mediator and plasma mediator results.

## Sheet: Lymph MAGNA Metab
	Lymph Tissue Monoacylglycerides and N-Acylethanolamides Concentrations (pmol/gr tissue)
	Tissue	Bronchial Lymph					Mediastinal Lymph
	Treatment	Ibuprofen (n=5)	Control (n=6)	p	VIP		Ibuprofen (n=8)	Control (n=8)	p	VIP
	1-OG	7530 (6684 - 8163)	6360 (5287.6 - 7760)	‡	2.1396		---	---	---	---
	2-OG	9830 (8100 - 11500)	7400 (4890 - 10400)	‡	1.9285		7840 (3120 - 20200)	6400 (3430 - 10400)	---	0.778645
	1-LG	2390 (1999.1 - 3370)	2650 (2090 - 3430)	---	0.904015		1670 (695 - 2780)	1670 (846 - 2610)	---	0.604612
	2-LG	7350 (4980 - 14000)	8590 (5710 - 12400)	---	0.749822		5030 (1500 - 9890)	4770 (1770 - 9030)	---	0.685751
	1-AG	849 (579 - 1190)	971 (769 - 1200)	---	0.927238		577 (75.9 - 1690)	717 (285 - 1480)	---	0.545735
	2-AG	2810 (1770 - 4790)	2990 (2090 - 4000)	---	0.444317		1850 (224 - 5150)	2070 (776 - 4720)	---	0.557619
	PEA	115 (93.588 - 154)	114 (75.9 - 138)	---	0.472962		138 (88.4 - 183)	146 (121 - 173)	---	0.28025
	SEA	99 (73.2 - 128)	105 (65 - 139)	---	0.606325		114 (92 - 166)	118 (79 - 161)	---	0.217005
	OEA	41.5 (30.7 - 58.8)	42.9 (28.2 - 66.9)	---	0.319327		52.4 (38.2 - 71.3)	57.9 (38.3 - 75.1)	---	0.678848
	LEA	27.2 (19.4 - 44.3)	25.8 (20 - 34.7)	---	0.637103		36.6 (23.1 - 51.5)	35.3 (28.2 - 49.6)	---	0.407671
	DGLEA	2.55 (1.82 - 3.26)	2.85 (1.88 - 3.88)	---	1.03234		4.06 (2.48 - 6.84)	3.72 (2.59 - 5.39)	---	0.738706
	AEA	8.53 (4.42 - 15.9)	9.35 (7.23 - 12)	---	0.557339		14.7 (6.24 - 20.8)	14.4 (10.2 - 18.7)	---	0.694265
	DEA	4.1 (3.29 - 6.4)	4.69 (3.11 - 6.84)	---	0.946935		6.88 (3.49 - 10.4)	7.01 (5.98 - 9.71)	---	0.554677
	DHEA	1.61 (1.12 - 2.19)	1.64 (1.49 - 1.94)	---	0.526178		1.78 (1.16 - 2.71)	1.63 (1.14 - 2.03)	---	0.612222
	Results are reported as Geometric Means (Ranges). Mean differences were determined by 2-tailed t-tests after transformation to normality. Differences are indicated at p<0.1 (+), p<0.05 †), p<0.01 (‡). Variable Importance in Projections (VIP) Scores are provided from the PLS-DA analysis using all clinical, cytokine, lymph mediator and plasma mediator results.
