# Supplementary material for: A Randomized Placebo Controlled Trial of Ibuprofen for Respiratory Syncytial Virus Infection in a Bovine Model
Source: PLoS One. 2016 Apr 13;11(4):e0152913. doi: 10.1371/journal.pone.0152913 (PMC4830518; doi:10.1371/journal.pone.0152913)
Supplement: S4 File — (XLSX) [file pone.0152913.s004.xlsx]

## Sheet: wide_format_cow_data_for_newman
calf_id	tot_acute_process	tot_acute_outcome	tot_chronic_process	tot_alveolus_acute	tot_bronchiole_acute	tot_bronchus_acute	tot_alveolus_chronic	tot_bronchiole_chronic	tot_bronchus_chronic	lt_caudal_percent	lt_lung_apical	lt_mid_percent	rt_accessory	rt_caudal_percent	rt_cranial_percent	rt_mid_percent	total_lungpercent	weight_final	weight_start	weight_gain	weight	temp0	c_taken0	nas_typ_right0	nas_typ_left0	nas_qty_left0	nas_qty_right0	oc_typ_right0	oc_qty_right0	oc_typ_left0	oc_qty_left0	resp_char0	comments0	rr0	pm_temp0	pm_resp0	pm_resp_comment0	nite_rep_comment0	nite_rr0	nite_temp0	nasal_dc0	eye_dc0	dyspnea0	mouth_breathing0	cough0	cough_induced0	adventitial0	dos0	conjunctivitis0
145	32	39	53	819	900	810	468	1900	1260	40	95	100	80	20	90	90	50	40.91	37.19	3.72	37.19	38.54		Serous	Serous	2	2	Serous	3	Serous	3	Normal	All fields within normal limits, sounds high end of normal.	16	39.05	21	All fields within normal limits	All fields within normal limits	20	38.7	Present	Present	0	No mouth breathing	No cough	Cough	0	2013-10-12	0
146	11	28	25	110	96	332	0	768	913	0	5	5	0	0	90	30	15	59.09	51.25	7.84	51.25	38.92				0	0		0		0	Normal	All fields within normal limits	24	38.8	20	All fields within normal limits	All fields within normal limits	24	39.22	Absent	Absent	0	No mouth breathing	No cough	No cough	0	2013-10-13	0
151	20	17	35	330	480	348	0	864	1218	0	0	0	0	0	95	5	20	51.37	48.53	2.84	48.53	35.54				0	0		0		0	Normal	All fields within normal limits	26	39.34	22	All fields within normal limits	All fields within normal limits	22	39.68	Absent	Absent	0	No mouth breathing	No cough	No cough	0	2013-10-13	0
153	27	32	48	570	1067	840	1026	1067	1008	10	30	10	90	5	70	100	25	51.37	47.63	3.74	47.63	38.08	Frisky			0	0		0		0	Normal	All lung fields within normal limits	24	39.12	18	All lung fields within normal limits	All lung fields within normal limits	20	39.3	Absent	Absent	0	No mouth breathing	No cough	No cough	0	2013-10-12	0
155	34	20	36	763	672	588	109	960	1008	0	5	80	0	0	100	60	25	54.55	45.36	9.19	45.36	38.28	Double check if cough, checkmark misplaced			0	0		0	Serous	1	Normal	All fields within normal limits	26	37.1	22	All fields within normal limits	All fields within normal limits	20	39.66	Absent	Present	0	No mouth breathing	Cough	No cough	0	2013-10-13	0
156	43	34	26	666	864	924	0	96	840	0	20	100	100	80	0	100	40	52.27	49	3.27	49	37.44			Serous	1	0	Serous	3	Serous	1	Normal	All fields within normal limits	24	36.8	24	All fields within normal limits	All fields within normal limits	26	37.42	Present	Present	0	No mouth breathing	No cough	No cough	0	2013-10-13	0
158	8	13	27	218	300	228	0	600	532	0	0	0	0	0	1	10	2.5	50.91	44.45	6.46	44.45	38.08		Serous	Serous	1	1	Serous	2		0	Normal	All fields within normal limits	16	38.72	22	All fields within normal limits	All fields within normal limits	18	38.5	Present	Present	0	No mouth breathing	No cough	No cough	0	2013-10-12	0
167	41	46	34	540	1056	1092	0	864	840	50	100	100	100	20	50	100	40	53.64	50.8	2.84	50.8	37.86				0	0		0		0	Normal	All fields within normal limits	20	38.86	20	All fields within normal limits	All fields within normal limits	20	39.4	Absent	Absent	0	No mouth breathing	No cough	No cough	0	2013-10-12	0
169	3	3	7	18	16	7	0	32	14	0	0	20	0	20	0	0	5	57.27	53.52	3.75	53.52	39.2		Serous	Serous	1	1		0		0	Normal	Quiet, all fields within normal limits	24	38.73	22	All fields within normal limits	All fields within normal limits	23	39.4	Present	Absent	0	No mouth breathing	No cough	Cough	0	2013-10-12	0
170	24	30	42	452	864	588	113	960	756	20	40	95	0	5	40	100	15	50	44.45	5.55	44.45	38.89		Seromucoid	Seromucoid	1	1	Serous	1	Serous	1	Normal	<All fields within normal limits> Very audible for baseline	26	37.62	24	All fields within normal limits	All fields within normal limits, prominent	26	39.62	Absent	Present	0	No mouth breathing	Cough	No cough	0	2013-10-13	0
173	14	22	27	400	264	228	0	792	532	15	0	75	100	20	20	100	25	49.09	45.36	3.73	45.36	39.22				0	0		0		0	Normal	All fields within normal limits	22	39.45	22	All fields within normal limits	All fields within normal limits	26	39.5	Absent	Absent	0	No mouth breathing	No cough	No cough	0	2013-10-13	0
176	49	35	35	990	1248	756	440	864	840	10	20	90	100	5	90	5	30	49.55	44.45	5.1	44.45	38.9				0	0		0		0	Normal	Very quiet all lung fields <all fields within normal limits>	18	38.96	18	All fields within normal limits	All fields within normal limits	22	39.6	Absent	Absent	0	No mouth breathing	No cough	No cough	0	2013-10-19	0
178	38	33	35	1107	1089	696	369	990	1044	30	30	100	100	0	30	100	25	53.18	49.44	3.74	49.44	38.24	Old crusting right eye			0	0		0		0	Normal	All fields within normal limits	24	38.9	24	All fields within normal limits	All fields within normal limits	20	39.1	Absent	Absent	0	No mouth breathing	No cough	No cough	0	2013-10-12	0
179	23	24	24	218	480	672	0	768	840	0	0	60	5	40	20	5	15	50.91	42.18	8.73	42.18
185	28	41	51	568	875	1284	0	1375	2461	10	10	50	50	50	95	40	35	55.45	49.44	6.01	49.44	38.51	Lying down and reluctant to rise but bright and alert. Crusting right eye	Serous	Serous	1	1	Serous	2	Serous	1	Normal	All fields within normal limits	20	39.14	20	All fields within normal limits_x000B_	All fields within normal limits_x000B_	16	39.1	Present	Present	0	No mouth breathing	No cough	No cough	0	2013-10-12	0
186	34	34	33	555	909	688	0	1111	946	10	10	100	25	5	80	10	15	48.64	42.64	6	42.64	37.98	single prescapular subcut node			0	0		0		0	Normal	All lung fields within normal limits	20	39.3	24	All lung fields within normal limits_x000B_	All lung fields within normal limits_x000B__x000B_	24	39.53	Absent	Absent	0	No mouth breathing	No cough	No cough	0	2013-10-13	0
[truncated: 386 more columns]

## Sheet: codebook 
Variable	Obs	Unique	Mean	Min	Max	Label
calf_id	16	16	165.438	145	186	Calf ID
calfid	16	16	165.438	145	186
tot_acute_~s	16	15	26.8125	3	49	Total Acute process histological score
tot_acute_~e	16	15	28.1875	3	46	Total a cute outcome histological score
tot_chroni~s	16	13	33.625	7	53	Total subacute process score for each calf
tot_alveol~e	16	15	520.25	18	1107
tot_~e_acute	16	14	698.75	16	1248
to~hus_acute	16	14	630.062	7	1284
tot_alveol~c	16	7	157.812	0	1026
to~e_chronic	16	12	875.688	32	1900
~hus_chronic	16	11	940.75	14	2461
lt_caudal_~t	16	7	12.1875	0	50	lt_caudal_percent
lt_lung_ap~l	16	8	22.8125	0	100	lt_lung_apical
lt_mid_per~t	16	11	61.5625	0	100	lt_mid_percent
rt_accessory	16	7	46.875	0	100	rt_accessory
rt_caudal_~t	16	6	16.875	0	80	rt_caudal_percent
rt_cranial~t	16	11	54.4375	0	100	rt_cranial_percent
rt_mid_per~t	16	8	53.4375	0	100	rt_mid_percent
total_lung~t	16	9	23.9062	2.5	50	total_lungpercent
weight_final	16	14	51.7625	40.91	59.09	id_cow::Final_weight
weight_start	16	12	46.6056	37.19	53.52	id_cow::weight
weight_gain	16	14	5.15688	2.84	9.19	Raw wegiht Gain
weight	16	12	46.6056	37.19	53.52	Weight in Kg
temp0	15	14	38.2453	35.54	39.22	0 temp
c_taken0	5	5	.	.	.	0 c_taken
nas_typ_r~t0	5	2	.	.	.	0 nas_typ_right
nas_typ_l~t0	6	2	.	.	.	0 nas_typ_left
nas_qty_l~t0	15	3	0.466667	0	2	0 nas_qty_left
nas_qty_r~t0	15	3	0.4	0	2	0 nas_qty_right
oc_typ_ri~t0	5	1	.	.	.	0 oc_typ_right
oc_qty_ri~t0	15	4	0.733333	0	3	0 oc_qty_right
oc_typ_left0	5	1	.	.	.	0 oc_typ_left
oc_qty_left0	15	3	0.466667	0	3	0 oc_qty_left
resp_char0	15	1	.	.	.	0 resp_char
comments0	15	7	.	.	.	0 comments
rr0	15	6	22	16	26	0 rr
pm_temp0	15	15	38.6593	36.8	39.45	0 pm_temp
pm_resp0	15	5	21.5333	18	24	0 pm_resp
pm_resp_c~t0	15	4	.	.	.	0 pm_resp_comment
nite_rep_~t0	15	5	.	.	.	0 nite_rep_comment
nite_rr0	15	7	21.8	16	26	0 nite_rr
nite_temp0	15	13	39.182	37.42	39.68	0 nite_temp
nasal_dc0	15	2	0.333333	0	1	0 nasal_dc
eye_dc0	15	2	0.4	0	1	0 eye_dc
dyspnea0	15	1	0	0	0	0 dyspnea
mouth_bre~g0	15	1	0	0	0	0 mouth_breathing
cough0	15	2	0.133333	0	1	0 cough
cough_ind~d0	15	2	0.133333	0	1	0 cough_induced
adventitial0	15	1	0	0	0	0 adventitial
dos0	15	3	19643.9	19643	19650	0 dos
conjuncti~s0	15	1	0	0	0	0 conjunctivitis
demeanour0	15	1	0	0	0	0 demeanour
anorexia0	15	1	0	0	0	0 anorexia
adenitis0	15	1	0	0	0	0 adenitis
collie0	15	4	4.60001	0	30.0001	0 collie
templess_~e0	15	12	45.3333	18	126	0 templess_collie
pm_anorexia0	15	1	0	0	0	0 pm_anorexia
ctemp0	15	14	-1.25467	-3.96	-0.279999	0 ctemp
temp1	16	12	38.6656	37.88	39.5	1 temp
c_taken1	5	5	.	.	.	1 c_taken
nas_typ_ri~1	5	2	.	.	.	1 nas_typ_right
nas_typ_le~1	4	2	.	.	.	1 nas_typ_left
nas_qty_le~1	16	3	0.3125	0	2	1 nas_qty_left
nas_qty_ri~1	16	3	0.375	0	2	1 nas_qty_right
oc_typ_rig~1	6	2	.	.	.	1 oc_typ_right
oc_qty_rig~1	16	4	0.6875	0	3	1 oc_qty_right
oc_typ_left1	4	1	.	.	.	1 oc_typ_left
oc_qty_left1	16	3	0.4375	0	2	1 oc_qty_left
resp_char1	16	1	.	.	.	1 resp_char
comments1	16	5	.	.	.	1 comments
rr1	16	7	23.1875	18	28	1 rr
pm_temp1	16	14	38.775	36.13	40.41	1 pm_temp
pm_resp1	16	7	23.5	18	30	1 pm_resp
pm_resp_co~1	16	6	.	.	.	1 pm_resp_comment
nite_rep_c~1	16	6	.	.	.	1 nite_rep_comment
nite_rr1	16	5	24.375	20	28	1 nite_rr
nite_temp1	16	15	39.5125	38.75	40.48	1 nite_temp
nasal_dc1	16	2	0.3125	0	1	1 nasal_dc
eye_dc1	15	2	0.266667	0	1	1 eye_dc
dyspnea1	16	1	0	0	0	1 dyspnea
mouth_brea~1	16	1	0	0	0	1 mouth_breathing
cough1	16	2	0.125	0	1	1 cough
cough_indu~1	16	2	0.3125	0	1	1 cough_induced
adventitial1	16	1	0	0	0	1 adventitial
dos1	16	2	19644.5	19644	19645	1 dos
conjunctiv~1	16	2	0.0625	0	1	1 conjunctivitis
demeanour1	16	1	0	0	0	1 demeanour
anorexia1	16	2	0.0625	0	1	1 anorexia
adenitis1	16	1	0	0	0	1 adenitis
collie1	16	5	15.375	0	138	1 collie
templess_c~1	16	14	52.5625	18	234	1 templess_collie
pm_anorexia1	16	2	0.0625	0	1	1 pm_anorexia
ctemp1	16	12	-0.834375	-1.62	0	1 ctemp
temp2	16	14	38.7594	37.18	40.02	2 temp
c_taken2	4	4	.	.	.	2 c_taken
nas_typ_ri~2	7	3	.	.	.	2 nas_typ_right
nas_typ_le~2	7	3	.	.	.	2 nas_typ_left
nas_qty_le~2	16	3	0.4375	0	2	2 nas_qty_left
nas_qty_ri~2	16	3	0.5625	0	2	2 nas_qty_right
oc_typ_rig~2	8	3	.	.	.	2 oc_typ_right
oc_qty_rig~2	16	4	1.0625	0	3	2 oc_qty_right
oc_typ_left2	6	2	.	.	.	2 oc_typ_left
oc_qty_left2	16	4	0.6875	0	3	2 oc_qty_left
resp_char2	16	1	.	.	.	2 resp_char
comments2	16	7	.	.	.	2 comments
rr2	16	9	24.4375	18	36	2 rr
pm_temp2	16	15	38.9937	37.86	40.04	2 pm_temp
pm_resp2	16	7	24.625	18	36	2 pm_resp
pm_resp_co~2	16	5	.	.	.	2 pm_resp_comment
nite_rep_c~2	16	7	.	.	.	2 nite_rep_comment
nite_rr2	16	7	26.5	20	36	2 nite_rr
nite_temp2	16	15	39.4319	38.48	40.68	2 nite_temp
nasal_dc2	16	2	0.375	0	1	2 nasal_dc
eye_dc2	15	2	0.533333	0	1	2 eye_dc
dyspnea2	16	1	0	0	0	2 dyspnea
mouth_brea~2	16	1	0	0	0	2 mouth_breathing
cough2	16	2	0.0625	0	1	2 cough
cough_indu~2	16	2	0.375	0	1	2 cough_induced
adventitial2	16	2	0.0625	0	1	2 adventitial
dos2	16	2	19645.5	19645	19646	2 dos
conjunctiv~2	16	2	0.125	0	1	2 conjunctivitis
demeanour2	16	1	0	0	0	2 demeanour
anorexia2	16	1	0	0	0	2 anorexia
adenitis2	16	1	0	0	0	2 adenitis
collie2	16	7	17.625	0	138	2 collie
templess_c~2	16	15	63.8125	18	206	2 templess_collie
pm_anorexia2	16	2	0.0625	0	1	2 pm_anorexia
ctemp2	16	14	-0.740625	-2.32	0.52	2 ctemp
temp3	16	16	38.8062	37.56	40.48	3 temp
c_taken3	1	1	.	.	.	3 c_taken
nas_typ_ri~3	5	2	.	.	.	3 nas_typ_right
nas_typ_le~3	5	1	.	.	.	3 nas_typ_left
nas_qty_le~3	16	3	0.4375	0	3	3 nas_qty_left
nas_qty_ri~3	16	3	0.4375	0	3	3 nas_qty_right
oc_typ_rig~3	8	2	.	.	.	3 oc_typ_right
oc_qty_rig~3	16	4	0.875	0	3	3 oc_qty_right
oc_typ_left3	4	2	.	.	.	3 oc_typ_left
oc_qty_left3	16	3	0.6875	0	3	3 oc_qty_left
resp_char3	16	1	.	.	.	3 resp_char
comments3	16	9	.	.	.	3 comments
rr3	16	8	27.1875	20	51	3 rr
pm_temp3	16	15	39.0825	38.02	40.4	3 pm_temp
pm_resp3	16	9	29.5625	22	44	3 pm_resp
pm_resp_co~3	16	8	.	.	.	3 pm_resp_comment
nite_rep_c~3	16	7	.	.	.	3 nite_rep_comment
nite_rr3	16	10	29.6875	18	40	3 nite_rr
nite_temp3	16	16	39.53	38.25	40.76	3 nite_temp
nasal_dc3	16	2	0.375	0	1	3 nasal_dc
eye_dc3	15	2	0.466667	0	1	3 eye_dc
dyspnea3	16	1	0	0	0	3 dyspnea
mouth_brea~3	16	1	0	0	0	3 mouth_breathing
cough3	16	2	0.0625	0	1	3 cough
cough_indu~3	16	2	0.6875	0	1	3 cough_induced
adventitial3	16	2	0.1875	0	1	3 adventitial
dos3	16	3	19647.1	19646	19657	3 dos
conjunctiv~3	16	2	0.0625	0	1	3 conjunctivitis
demeanour3	16	1	0	0	0	3 demeanour
anorexia3	16	2	0.0625	0	1	3 anorexia
adenitis3	16	1	0	0	0	3 adenitis
collie3	16	8	45.875	0	399	3 collie
templess_c~3	16	15	84.6875	20	301	3 templess_collie
pm_anorexia3	16	2	0.0625	0	1	3 pm_anorexia
ctemp3	16	16	-0.69375	-1.94	0.98	3 ctemp
temp4	16	15	38.995	38.4	40.3	4 temp
c_taken4	1	1	.	.	.	4 c_taken
nas_typ_ri~4	6	2	.	.	.	4 nas_typ_right
nas_typ_le~4	7	3	.	.	.	4 nas_typ_left
nas_qty_le~4	16	3	0.5	0	2	4 nas_qty_left
nas_qty_ri~4	16	2	0.375	0	1	4 nas_qty_right
oc_typ_rig~4	11	2	.	.	.	4 oc_typ_right
oc_qty_rig~4	16	4	1.4375	0	3	4 oc_qty_right
oc_typ_left4	10	2	.	.	.	4 oc_typ_left
oc_qty_left4	16	4	1.1875	0	3	4 oc_qty_left
resp_char4	16	3	.	.	.	4 resp_char
comments4	16	8	.	.	.	4 comments
rr4	16	11	28.25	18	53	4 rr
pm_temp4	16	16	39.0375	37.88	39.7	4 pm_temp
pm_resp4	16	11	36.125	24	56	4 pm_resp
pm_resp_co~4	16	13	.	.	.	4 pm_resp_comment
nite_rep_c~4	16	16	.	.	.	4 nite_rep_comment
nite_rr4	16	10	44.1875	28	60	4 nite_rr
nite_temp4	16	15	39.6962	39	41.22	4 nite_temp
nasal_dc4	16	2	0.375	0	1	4 nasal_dc
eye_dc4	15	2	0.733333	0	1	4 eye_dc
dyspnea4	16	1	0	0	0	4 dyspnea
mouth_brea~4	16	1	0	0	0	4 mouth_breathing
cough4	16	2	0.0625	0	1	4 cough
cough_indu~4	16	2	0.625	0	1	4 cough_induced
adventitial4	16	2	0.25	0	1	4 adventitial
dos4	16	3	19647.6	19647	19649	4 dos
conjunctiv~4	16	2	0.3125	0	1	4 conjunctivitis
demeanour4	16	2	0.0625	0	1	4 demeanour
anorexia4	16	1	0	0	0	4 anorexia
adenitis4	16	1	0	0	0	4 adenitis
collie4	16	11	63.75	0	315	4 collie
templess_c~4	16	16	104.5	24	293	4 templess_collie
pm_anorexia4	16	1	0	0	0	4 pm_anorexia
ctemp4	16	15	-0.505	-1.1	0.799999	4 ctemp
temp5	16	15	39.4537	38.68	40.92	5 temp
c_taken5	3	3	.	.	.	5 c_taken
nas_typ_ri~5	8	3	.	.	.	5 nas_typ_right
nas_typ_le~5	7	3	.	.	.	5 nas_typ_left
nas_qty_le~5	16	3	0.6875	0	2	5 nas_qty_left
nas_qty_ri~5	16	3	0.6875	0	2	5 nas_qty_right
oc_typ_rig~5	9	3	.	.	.	5 oc_typ_right
oc_qty_rig~5	16	4	1.1875	0	3	5 oc_qty_right
oc_typ_left5	9	3	.	.	.	5 oc_typ_left
oc_qty_left5	16	4	1.1875	0	3	5 oc_qty_left
resp_char5	16	3	.	.	.	5 resp_char
comments5	16	13	.	.	.	5 comments
rr5	16	13	38.9375	20	83	5 rr
pm_temp5	16	16	38.7338	36.58	40.12	5 pm_temp
pm_resp5	16	12	79.6875	32	490	5 pm_resp
pm_resp_co~5	16	15	.	.	.	5 pm_resp_comment
nite_rep_c~5	16	14	.	.	.	5 nite_rep_comment
nite_rr5	16	9	49.5625	36	76	5 nite_rr
nite_temp5	16	15	39.3488	37.54	41.06	5 nite_temp
nasal_dc5	16	2	0.5	0	1	5 nasal_dc
eye_dc5	16	2	0.5625	0	1	5 eye_dc
dyspnea5	16	1	0	0	0	5 dyspnea
mouth_brea~5	16	1	0	0	0	5 mouth_breathing
cough5	16	2	0.4375	0	1	5 cough
cough_indu~5	16	2	0.8125	0	1	5 cough_induced
adventitial5	16	2	0.625	0	1	5 adventitial
dos5	16	3	19648.6	19648	19650	5 dos
conjunctiv~5	16	2	0.25	0	1	5 conjunctivitis
demeanour5	16	2	0.1875	0	1	5 demeanour
anorexia5	16	1	0	0	0	5 anorexia
adenitis5	16	1	0	0	0	5 adenitis
collie5	16	13	172.062	0	504	5 collie
templess_c~5	16	15	172.688	31	403	5 templess_collie
pm_anorexia5	16	1	0	0	0	5 pm_anorexia
ctemp5	16	15	-0.0462503	-0.82	1.42	5 ctemp
temp6	16	16	39.1769	37.7	41.2	6 temp
c_taken6	2	2	.	.	.	6 c_taken
nas_typ_ri~6	4	1	.	.	.	6 nas_typ_right
nas_typ_le~6	5	2	.	.	.	6 nas_typ_left
nas_qty_le~6	16	3	0.375	0	2	6 nas_qty_left
nas_qty_ri~6	16	3	0.3125	0	2	6 nas_qty_right
oc_typ_rig~6	11	3	.	.	.	6 oc_typ_right
oc_qty_rig~6	16	4	1.5	0	3	6 oc_qty_right
oc_typ_left6	11	2	.	.	.	6 oc_typ_left
oc_qty_left6	16	4	1.4375	0	3	6 oc_qty_left
resp_char6	16	3	.	.	.	6 resp_char
comments6	16	12	.	.	.	6 comments
rr6	16	16	45.6875	20	76	6 rr
pm_temp6	16	13	39.3937	37.27	40.94	6 pm_temp
pm_resp6	16	10	60.0625	36	100	6 pm_resp
pm_resp_co~6	16	16	.	.	.	6 pm_resp_comment
nite_rep_c~6	16	14	.	.	.	6 nite_rep_comment
nite_rr6	16	12	60.75	32	102	6 nite_rr
nite_temp6	16	15	39.4231	38.75	40.56	6 nite_temp
nasal_dc6	16	2	0.3125	0	1	6 nasal_dc
eye_dc6	15	2	0.8	0	1	6 eye_dc
dyspnea6	16	2	0.1875	0	1	6 dyspnea
mouth_brea~6	16	1	0	0	0	6 mouth_breathing
cough6	16	2	0.5	0	1	6 cough
cough_indu~6	16	2	0.625	0	1	6 cough_induced
adventitial6	16	2	0.75	0	1	6 adventitial
dos6	16	2	19649.5	19649	19650	6 dos
conjunctiv~6	16	2	0.125	0	1	6 conjunctivitis
demeanour6	16	2	0.1875	0	1	6 demeanour
anorexia6	16	1	0	0	0	6 anorexia
adenitis6	16	2	0.0625	0	1	6 adenitis
collie6	16	15	177.562	0	566	6 collie
templess_c~6	16	13	207.562	50	396	6 templess_collie
pm_anorexia6	16	1	0	0	0	6 pm_anorexia
ctemp6	16	16	-0.323125	-1.8	1.7	6 ctemp
temp7	16	14	39.2488	37.18	40.62	7 temp
c_taken7	7	6	.	.	.	7 c_taken
nas_typ_ri~7	7	3	.	.	.	7 nas_typ_right
nas_typ_le~7	7	3	.	.	.	7 nas_typ_left
nas_qty_le~7	16	3	0.5	0	2	7 nas_qty_left
nas_qty_ri~7	16	3	0.625	0	2	7 nas_qty_right
oc_typ_rig~7	12	3	.	.	.	7 oc_typ_right
oc_qty_rig~7	16	4	1.5625	0	3	7 oc_qty_right
oc_typ_left7	12	3	.	.	.	7 oc_typ_left
oc_qty_left7	16	4	1.4375	0	3	7 oc_qty_left
resp_char7	16	3	.	.	.	7 resp_char
comments7	15	11	.	.	.	7 comments
rr7	16	12	55.9375	28	100	7 rr
pm_temp7	16	15	39.6519	36.96	41.26	7 pm_temp
pm_resp7	16	13	75	40	112	7 pm_resp
pm_resp_co~7	16	12	.	.	.	7 pm_resp_comment
nite_rep_c~7	16	15	.	.	.	7 nite_rep_comment
nite_rr7	16	13	79.625	52	116	7 nite_rr
nite_temp7	16	16	40.0087	37.36	42.86	7 nite_temp
nasal_dc7	16	2	0.5	0	1	7 nasal_dc
eye_dc7	16	2	0.75	0	1	7 eye_dc
dyspnea7	16	2	0.4375	0	1	7 dyspnea
mouth_brea~7	16	2	0.0625	0	1	7 mouth_breathing
cough7	16	2	0.4375	0	1	7 cough
cough_indu~7	16	2	0.5	0	1	7 cough_induced
adventitial7	16	2	0.8125	0	1	7 adventitial
dos7	16	2	19650.5	19650	19651	7 dos
conjunctiv~7	16	2	0.25	0	1	7 conjunctivitis
demeanour7	16	2	0.3125	0	1	7 demeanour
anorexia7	16	2	0.0625	0	1	7 anorexia
adenitis7	16	2	0.0625	0	1	7 adenitis
collie7	16	16	253.312	3	652	7 collie
templess_c~7	16	16	278.438	78	602	7 templess_collie
pm_anorexia7	16	2	0.1875	0	1	7 pm_anorexia
ctemp7	16	14	-0.25125	-2.32	1.12	7 ctemp
temp8	16	14	39.7756	37.92	41.48	8 temp
c_taken8	5	5	.	.	.	8 c_taken
nas_typ_ri~8	8	2	.	.	.	8 nas_typ_right
nas_typ_le~8	7	2	.	.	.	8 nas_typ_left
nas_qty_le~8	16	3	0.625	0	2	8 nas_qty_left
nas_qty_ri~8	16	3	0.625	0	2	8 nas_qty_right
oc_typ_rig~8	8	3	.	.	.	8 oc_typ_right
oc_qty_rig~8	16	4	1.1875	0	3	8 oc_qty_right
oc_typ_left8	8	3	.	.	.	8 oc_typ_left
oc_qty_left8	16	4	1	0	3	8 oc_qty_left
resp_char8	16	2	.	.	.	8 resp_char
comments8	16	12	.	.	.	8 comments
rr8	16	12	70.375	39	100	8 rr
pm_temp8	16	16	39.6069	38.64	41.32	8 pm_temp
pm_resp8	16	13	82.25	40	126	8 pm_resp
pm_resp_co~8	16	15	.	.	.	8 pm_resp_comment
nite_rep_c~8	15	13	.	.	.	8 nite_rep_comment
nite_rr8	15	13	75	50	113	8 nite_rr
nite_temp8	15	15	39.758	38.22	41.16	8 nite_temp
nasal_dc8	16	2	0.5	0	1	8 nasal_dc
eye_dc8	16	2	0.5625	0	1	8 eye_dc
dyspnea8	16	2	0.4375	0	1	8 dyspnea
mouth_brea~8	16	1	0	0	0	8 mouth_breathing
cough8	16	2	0.4375	0	1	8 cough
cough_indu~8	16	2	0.6875	0	1	8 cough_induced
adventitial8	16	1	1	1	1	8 adventitial
dos8	16	2	19651.5	19651	19652	8 dos
conjunctiv~8	16	2	0.25	0	1	8 conjunctivitis
demeanour8	16	2	0.5625	0	1	8 demeanour
anorexia8	16	1	0	0	0	8 anorexia
adenitis8	16	1	0	0	0	8 adenitis
collie8	16	16	346.062	33.9999	658	8 collie
templess_c~8	16	15	318.5	149	504	8 templess_collie
pm_anorexia8	16	2	0.0625	0	1	8 pm_anorexia
ctemp8	16	14	0.275625	-1.58	1.98	8 ctemp
temp9	13	13	39.1746	37.3	40.7	9 temp
c_taken9	5	5	.	.	.	9 c_taken
nas_typ_ri~9	7	3	.	.	.	9 nas_typ_right
nas_typ_le~9	4	3	.	.	.	9 nas_typ_left
nas_qty_le~9	13	3	0.384615	0	2	9 nas_qty_left
nas_qty_ri~9	13	3	0.692308	0	2	9 nas_qty_right
oc_typ_rig~9	6	3	.	.	.	9 oc_typ_right
oc_qty_rig~9	13	3	0.923077	0	3	9 oc_qty_right
oc_typ_left9	7	2	.	.	.	9 oc_typ_left
oc_qty_left9	13	4	0.923077	0	3	9 oc_qty_left
resp_char9	13	3	.	.	.	9 resp_char
comments9	13	11	.	.	.	9 comments
rr9	13	12	67	28	100	9 rr
pm_temp9	13	13	39.3985	38.5	40.5	9 pm_temp
pm_resp9	13	10	72	42	100	9 pm_resp
pm_resp_co~9	13	9	.	.	.	9 pm_resp_comment
nite_rep_c~9	13	13	.	.	.	9 nite_rep_comment
nite_rr9	13	10	74	48	102	9 nite_rr
nite_temp9	13	11	39.5598	38.79	40.74	9 nite_temp
nasal_dc9	13	2	0.538462	0	1	9 nasal_dc
eye_dc9	13	2	0.615385	0	1	9 eye_dc
dyspnea9	13	2	0.230769	0	1	9 dyspnea
mouth_brea~9	13	1	0	0	0	9 mouth_breathing
cough9	13	2	0.538462	0	1	9 cough
cough_indu~9	13	2	0.846154	0	1	9 cough_induced
adventitial9	13	1	1	1	1	9 adventitial
dos9	13	2	19652.4	19652	19653	9 dos
conjunctiv~9	13	2	0.153846	0	1	9 conjunctivitis
demeanour9	13	2	0.538462	0	1	9 demeanour
anorexia9	13	2	0.0769231	0	1	9 anorexia
adenitis9	13	1	0	0	0	9 adenitis
collie9	13	13	269.231	0	648	9 collie
templess_c~9	13	13	296.231	148	528	9 templess_collie
pm_anorexia9	13	2	0.153846	0	1	9 pm_anorexia
ctemp9	13	13	-0.325385	-2.2	1.2	9 ctemp
temp10	15	14	39.3481	38.04	40.59	10 temp
c_taken10	4	4	.	.	.	10 c_taken
nas_typ_r~10	7	2	.	.	.	10 nas_typ_right
nas_typ_l~10	8	2	.	.	.	10 nas_typ_left
nas_qty_l~10	15	4	0.866667	0	3	10 nas_qty_left
nas_qty_r~10	15	4	0.733333	0	3	10 nas_qty_right
oc_typ_ri~10	7	2	.	.	.	10 oc_typ_right
oc_qty_ri~10	15	4	1.13333	0	3	10 oc_qty_right
oc_typ_le~10	8	2	.	.	.	10 oc_typ_left
oc_qty_le~10	15	4	1.13333	0	3	10 oc_qty_left
resp_char10	15	2	.	.	.	10 resp_char
comments10	15	11	.	.	.	10 comments
rr10	15	14	70.4	24	106	10 rr
pm_temp10	0	0	.	.	.	10 pm_temp
pm_resp10	0	0	.	.	.	10 pm_resp
pm_resp_c~10	0	0	.	.	.	10 pm_resp_comment
nite_rep_~10	0	0	.	.	.	10 nite_rep_comment
nite_rr10	0	0	.	.	.	10 nite_rr
nite_temp10	0	0	.	.	.	10 nite_temp
nasal_dc10	15	2	0.533333	0	1	10 nasal_dc
eye_dc10	15	2	0.533333	0	1	10 eye_dc
dyspnea10	15	2	0.4	0	1	10 dyspnea
mouth_bre~10	15	2	0.0666667	0	1	10 mouth_breathing
cough10	15	2	0.6	0	1	10 cough
cough_ind~10	15	2	0.8	0	1	10 cough_induced
adventiti~10	15	2	0.933333	0	1	10 adventitial
dos10	15	2	19653.5	19653	19654	10 dos
conjuncti~10	15	2	0.133333	0	1	10 conjunctivitis
demeanour10	15	2	0.466667	0	1	10 demeanour
anorexia10	15	2	0.0666667	0	1	10 anorexia
adenitis10	15	2	0.0666667	0	1	10 adenitis
collie10	15	15	303.213	24.0002	718	10 collie
templess_~10	15	15	318.4	86	616	10 templess_collie
pm_anorex~10	15	2	0.0666667	0	1	10 pm_anorexia
ctemp10	15	14	-0.151866	-1.46	1.09	10 ctemp
titre	16	4	48.125	10	160	Maternal antibody titre 1/**
inf_order	16	2	1.5	1	2	Order infected
group	16	2	.	.	.	Drug treatment group
tag	16	16	165.438	145	186	Calf Number
dob	16	8	19611.6	19605	19617	Birthdate of calf
titre1	16	4	0.0488281	0.00625	0.1	Maternal antibody titre (decimal)
treat	16	2	0.5	0	1	Treatment assigned
m1	16	10	5.25	1	10	Decile of clinical score
m2	16	2	0.0625	0	1	Top 10% of Colie Scores
m3	16	2	0.1875	0	1	Top twenty % of Collie Scores
drug	16	2	0.5	0	1
sampleid	16	16	134072	134034	134109	Sample ID #
samplename	16	16	.	.	.	Sample Name
ifng_n	16	16	8.79312	6.61	11.9	IFNg_N
il13_n	16	14	6.69562	0	9.46	IL13_N
il17_n	16	16	8.23188	5.55	12.92	IL17_N
il4_n	16	11	5.78437	0	11.35	IL4_N
ifng_fold	8	8	1.75433	-1.05885	5.88687	IFNg_fold
il13_fold	8	8	1.87301	-1.08423	3.63847	IL13_fold
il17_fold	8	8	1.87907	-1.66296	8.37593	IL17_fold
il4_fold	8	6	-0.165428	-3.34035	1.7411	IL4_fold
ratio_IL4_~g	16	16	35.3909	0.789234	120
ratio_Ifhg	16	11	0.678007	0	1.27018
ln_il4	10	10	2.21624	1.96991	2.42922
ln_ifn	16	16	2.16617	1.88858	2.47654
bc_skew_ifng	16	16	1.22275	1.13978	1.30323	(ifng_n^-.5887958-1)/-.5887958
bc_il4_n	10	10	2.14345	1.91246	2.34226	(il4_n^-.0301985-1)/-.0301985
age0	15	11	32.6667	26	39
_merge	16	1	3	3	3
