# Supplementary material for: A Randomized Placebo Controlled Trial of Ibuprofen for Respiratory Syncytial Virus Infection in a Bovine Model
Source: PLoS One. 2016 Apr 13;11(4):e0152913. doi: 10.1371/journal.pone.0152913 (PMC4830518; doi:10.1371/journal.pone.0152913)
Supplement: S4 Table — Complete results of lipids measured in plasma. (XLSX) [file pone.0152913.s008.xlsx]

## Sheet: Plasma COX Metabolites
	Plasma COX-Associated Metabolite Profiles
		Day 0		Day 3		Day 7		Day 10
		Control
	COX Metabolism
	TXB2	0.0512 (0.024 - 0.101)		0.0785 (0.0261 - 0.317)		0.0637 (0.0376 - 0.104)		0.396 (0.0598 - 2.48)
	PGD2	0.051 (0.0145 - 0.102)		0.0838 (0.024 - 0.349)		0.0859 (0.0448 - 0.142)		0.0746 (0.0386 - 0.192)
	11-HETE	4.58 (1.99 - 10.4)		5.28 (3.15 - 14)		5.88 (2.81 - 19)		5.01 (1.97 - 14)
	9-HODE	66.1 (25 - 153)		132 (65.1 - 360)		86.9 (45.8 - 280)		72.2 (34.8 - 185)
		Ibuprofen
	TXB2	0.0673 (0.038 - 0.165)	---	0.0683 (0.0413 - 0.0981)	---	0.0378 (0.0223 - 0.0647)	†	0.0986 (0.0212 - 0.0695)	+
	PGD2	0.049 (0.0205 - 0.123)	---	0.0687 (0.0204 - 0.181)	---	0.0649 (0.0192 - 0.15)	---	0.0925 (0.0226 - 0.428)	---
	11-HETE	5.64 (4.02 - 9.58)	---	4.48 (2.12 - 15.9)	---	6.14 (3.99 - 12.1)	---	5.68 (1.82 - 17)	---
	9-HODE	87 (58.2 - 140)	---	95 (47.8 - 296)	---	104 (56.1 - 175)	---	104 (31.2 - 297)	---
	Results are reported as Geometric Means (Ranges) of n=8/group. Treatment differences in means were determined by 2-tailed t-tests after transformation to normality. Differences are indicated at p<0.1 (+), p<0.05 †), p<0.01 (‡).

## Sheet: Plasma sEH Metabolites
	Plasma sEH-Dependent Metabolism Metabolite Concentrations (nM)
		Day 0		Day 3		Day 7		Day 10
		Control
	12,13-DiHOME	0.137 (0.0855 - 0.26)		0.157 (0.118 - 0.24)		0.0588 (0.0381 - 0.102)		0.0464 (0.0319 - 0.0947)
	9,10-DiHOME	4.78 (3.11 - 9.44)		5.85 (4.27 - 8.78)		2.3 (1.65 - 4.72)		2.08 (1.32 - 3.36)
	15,16-DiHODE	12 (8.2 - 19.4)		13.8 (9.89 - 23.2)		6.37 (3.93 - 9.34)		4.51 (2.19 - 11.1)
	9,10-DiHODE	0.519 (0.258 - 1.31)		0.815 (0.595 - 1.39)		0.195 (0.111 - 0.475)		0.158 (0.0761 - 0.386)
	14,15-DiHETrE	0.402 (0.311 - 0.507)		0.404 (0.292 - 0.596)		0.465 (0.315 - 0.682)		0.408 (0.287 - 0.563)
	11,12-DiHETrE	0.483 (0.328 - 0.718)		0.504 (0.335 - 0.814)		0.543 (0.304 - 0.89)		0.449 (0.273 - 0.671)
	8,9-DiHETrE	0.202 (0.148 - 0.269)		0.213 (0.143 - 0.297)		0.211 (0.164 - 0.332)		0.203 (0.136 - 0.419)
	5,6-DiHETrE	0.252 (0.157 - 0.374)		0.239 (0.107 - 0.356)		0.33 (0.206 - 0.462)		0.26 (0.191 - 0.341)
	17,18-DiHETE	8.59 (5.85 - 10.7)		9.03 (7.1 - 11.9)		8.67 (5.85 - 11.8)		8.06 (6.46 - 10.6)
	19,20-DiHDoPE	0.849 (0.391 - 1.33)		0.784 (0.329 - 1.31)		0.86 (0.403 - 1.4)		0.707 (0.395 - 1.07)
	9_12_13-TriHOME	8.19 (4.55 - 13.1)		13.4 (6.35 - 45.5)		6.48 (4.41 - 9.32)		4.97 (3.17 - 8.03)
		Ibuprofen
	12,13-DiHOME	0.12 (0.0848 - 0.224)	---	0.119 (0.0895 - 0.187)	+	0.0731 (0.0267 - 0.126)	---	0.0508 (0.0347 - 0.0761)	---
	9,10-DiHOME	4.45 (3.03 - 8.77)	---	4.94 (3.78 - 7.76)	---	2.86 (1.28 - 6.09)	---	2.15 (1.82 - 3.02)	---
	15,16-DiHODE	10 (7.21 - 15.7)	---	11.3 (9.37 - 16.3)	+	6.43 (3.24 - 14.7)	---	4.37 (3.36 - 5.54)	---
	9,10-DiHODE	0.527 (0.356 - 0.986)	---	0.745 (0.526 - 1.27)	---	0.266 (0.109 - 0.946)	---	0.194 (0.0633 - 0.296)	---
	14,15-DiHETrE	0.362 (0.284 - 0.469)	---	0.375 (0.331 - 0.497)	---	0.426 (0.28 - 0.604)	---	0.341 (0.285 - 0.392)	+
	11,12-DiHETrE	0.436 (0.348 - 0.679)	---	0.412 (0.335 - 0.541)	---	0.436 (0.197 - 0.643)	---	0.292 (0.207 - 0.398)	‡
	8,9-DiHETrE	0.168 (0.117 - 0.232)	---	0.179 (0.145 - 0.24)	+	0.207 (0.129 - 0.397)	---	0.172 (0.123 - 0.274)	---
	5,6-DiHETrE	0.274 (0.162 - 0.528)	---	0.238 (0.126 - 0.396)	---	0.364 (0.254 - 0.605)	---	0.243 (0.128 - 0.348)	---
	17,18-DiHETE	6.48 (4.03 - 9.39)	†	7.52 (6.14 - 9.95)	†	8.11 (6.94 - 11.4)	---	6.93 (6.23 - 7.58)	+
	19,20-DiHDoPE	0.578 (0.36 - 0.901)	†	0.63 (0.42 - 0.869)	---	0.769 (0.356 - 1.6)	---	0.498 (0.346 - 0.786)	†
	9_12_13-TriHOME	7.89 (5.75 - 10.7)	---	10.2 (5.29 - 26.7)	---	6.87 (4.97 - 12)	---	5.18 (2.54 - 10.2)	---
	Results are reported as Geometric Means (Ranges) of n=8/group. Treatment differences in means were determined by 2-tailed t-tests after transformation to normality. Differences are indicated at p<0.1 (+), p<0.05 †), p<0.01 (‡).

## Sheet: Plasma CYP Metabolites
	Plasma CYP Epoxygenase-Dependent Metabolite Concentrations (nM)
		Day 0		Day 3		Day 7		Day 10
		Control
	12(13)-EpOME	4.61 (2.14 - 14.2)		9.99 (7.84 - 15.1)		3.04 (1.7 - 5.91)		3.11 (2.21 - 4.33)
	9(10)-EpOME	3 (1.27 - 6.75)		5.7 (3.82 - 8.14)		2.31 (1.03 - 4.99)		2.32 (1.65 - 3.93)
	15(16)-EpODE	4.54 (1.7 - 22.4)		12.2 (7.17 - 21.9)		2.28 (1.36 - 4.44)		2.01 (1.21 - 3.7)
	9(10)-EpODE	0.588 (0.306 - 1.83)		1.26 (0.654 - 2.44)		0.406 (0.293 - 0.851)		0.425 (0.240 - 0.746)
	14(15)-EpETrE	0.0833 (0.0169 - 0.178)		0.132 (0.0605 - 0.302)		0.0916 (0.0205 - 0.255)		0.117 (0.0447 - 0.224)
	11(12)-EpETrE	0.116 (0.0712 - 0.276)		0.139 (0.0569 - 0.246)		0.128 (0.0396 - 0.325)		0.11 (0.0581 - 0.165)
		Ibuprofen
	12(13)-EpOME	5.86 (3.27 - 11.9)	---	6.91 (3.36 - 14)	+	3.93 (2.56 - 5.81)	---	3.72 (1.86 - 7.47)	---
	9(10)-EpOME	3.63 (1.95 - 6.29)	---	4.34 (2.49 - 8.37)	---	2.94 (1.55 - 4.51)	---	2.69 (1.47 - 5.01)	---
	15(16)-EpODE	6.2 (2.48 - 18.5)	---	6.94 (2.6 - 17)	+	2.66 (1.36 - 4.11)	---	2.22 (1.45 - 5.09)	---
	9(10)-EpODE	0.642 (0.339 - 1.35)	---	0.91 (0.436 - 2.01)	---	0.496 (0.2 - 1.48)	---	0.527 (0.211 - 1.05)	---
	14(15)-EpETrE	0.162 (0.0502 - 0.311)	†	0.158 (0.0936 - 0.263)	---	0.119 (0.0151 - 0.312)	---	0.0762 (0.0281 - 0.238)	---
	11(12)-EpETrE	0.118 (0.0582 - 0.2)	---	0.17 (0.0872 - 0.368)	---	0.135 (0.0661 - 0.212)	---	0.111 (0.0444 - 0.245)	---
	Results are reported as Geometric Means (Ranges) of n=8/group. Treatment differences in means were determined by 2-tailed t-tests after transformation to normality. Differences are indicated at p<0.1 (+), p<0.05 †), p<0.01 (‡).

## Sheet: Plasma LOX Metabolites
	Plasma Lipoxygenase-Associated Metabolite Profiles Metabolite Concentrations (nM)
		Day 0		Day 3		Day 7		Day 10
		Control
	13-HODE	65.6 (25.1 - 135)		119 (64.3 - 278)		75.8 (41.1 - 238)		65.5 (37.2 - 143)
	13-HOTE	4.46 (2.29 - 7.2)		8.32 (6.09 - 12.4)		4.31 (2.7 - 9.28)		3.42 (1.3 - 6.74)
	9-HOTE	1.48 (0.574 - 2.98)		3.83 (2.02 - 7.61)		2.74 (1.43 - 8.09)		1.88 (0.897 - 5.25)
	15-HETE	5.9 (2.53 - 14.1)		7.89 (4.9 - 22.9)		8.06 (3.8 - 21.9)		6.6 (2.97 - 17.6)
	15-HEPE	0.182 (0.119 - 0.294)		0.234 (0.092 - 0.461)		0.292 (0.114 - 1)		0.282 (0.0781 - 0.551)
	12-HETE	13 (5.26 - 37.6)		10.5 (4.44 - 25)		9.62 (5.67 - 24)		10.8 (4.42 - 18.6)
	12-HEPE	0.374 (0.181 - 0.919)		0.322 (0.191 - 0.781)		0.384 (0.17 - 1.05)		0.397 (0.277 - 0.582)
	8-HETE	4.76 (1.87 - 13.5)		7.34 (4.67 - 19.5)		7.13 (2.98 - 21.4)		4.7 (1.26 - 16.8)
	17-HDoHE	3.65 (1.16 - 12.9)		5.51 (2.58 - 9.67)		5.07 (2.08 - 10.6)		3.6 (1.34 - 14.1)
	8,15-DiHETE	1.36 (0.42 - 4.09)		1.49 (0.281 - 9.6)		1.31 (0.758 - 3.73)		1.91 (0.881 - 5.5)
	5-HETE	215 (83.7 - 514)		194 (86.9 - 527)		231 (113 - 547)		204 (74.8 - 400)
	5-HEPE	4.92 (2.25 - 11)		5.55 (2.7 - 12.6)		7.42 (3.19 - 16.3)		5.31 (1.96 - 11.9)
	5,15-DiHETE	3.31 (1.56 - 12.8)		3.37 (1.38 - 17.4)		4.66 (1.87 - 17.8)		4.14 (1.24 - 11.5)
	4-HDoHE	165 (133 - 197)		126 (103 - 160)		126 (64 - 168)		125 (62.2 - 188)
		Ibuprofen
	13-HODE	82 (55 - 155)	---	86.8 (44 - 254)	---	92.2 (51.8 - 179)	---	89.7 (34.4 - 226)	---
	13-HOTE	5.3 (3.38 - 7.99)	---	5.97 (3.41 - 10.2)	+	5.19 (3.02 - 9.53)	---	4.63 (2.74 - 8.75)	---
	9-HOTE	2.2 (1.26 - 3.68)	---	2.49 (1.13 - 6.41)	---	2.96 (2.02 - 5.69)	---	2.72 (1.05 - 7.07)	---
	15-HETE	7.84 (5.97 - 11.1)	---	7 (3.54 - 21.6)	---	8.55 (6.01 - 12.1)	---	8.13 (2.63 - 18.3)	---
	15-HEPE	0.182 (0.049 - 0.289)	---	0.19 (0.0509 - 1.03)	---	0.325 (0.183 - 0.553)	---	0.267 (0.0904 - 0.619)	---
	12-HETE	13.7 (8.07 - 21.8)	---	9.1 (4.91 - 22.3)	---	10.6 (7.28 - 16.9)	---	13.7 (6.56 - 32.8)	---
	12-HEPE	0.341 (0.18 - 0.629)	---	0.335 (0.199 - 0.756)	---	0.376 (0.231 - 0.724)	---	0.401 (0.22 - 1.06)	---
	8-HETE	6.26 (4.33 - 9.71)	---	5.47 (2.71 - 19.2)	---	6.97 (3.67 - 13.4)	---	6.92 (2.21 - 19.4)	---
	17-HDoHE	4.55 (2.65 - 6.92)	---	3.78 (1.29 - 10.6)	---	5.2 (3.32 - 11.2)	---	4.03 (1.86 - 11.5)	---
	8,15-DiHETE	1.15 (0.544 - 1.9)	---	---	---	1.27 (0.699 - 2.64)	---	2.15 (0.729 - 8.4)	---
	5-HETE	246 (115 - 457)	---	209 (87.1 - 636)	---	277 (141 - 463)	---	267 (69 - 479)	---
	5-HEPE	5.78 (3.56 - 8.05)	---	5.29 (1.88 - 12.2)	---	7.34 (3.26 - 14.5)	---	7 (2.03 - 12)	---
	5,15-DiHETE	3.58 (1.16 - 10.2)	---	3.47 (1.25 - 16)	---	5.53 (2.47 - 11.1)	---	5.32 (0.937 - 15.7)	---
	4-HDoHE	143 (72.1 - 210)	---	106 (21.5 - 218)	---	169 (137 - 252)	+	141 (79.7 - 263)	---
	Results are reported as Geometric Means (Ranges) of n=8/group. Treatment differences in means were determined by 2-tailed t-tests after transformation to normality. Differences are indicated at p<0.1 (+), p<0.05 †), p<0.01 (‡).

## Sheet: Plasma ADH Metabolites
	Plasma Fatty Acid Alcohol Dehydrogenase-Associated Metabolite Profiles Metabolite Concentrations (nM)
		Day 0		Day 3		Day 7		Day 10
		Control
	13-KODE	7.56 (2.94 - 21.9)		16.3 (4.68 - 53.4)		9.25 (5.22 - 29.3)		6.55 (3.52 - 14.9)
	9-KODE	12.7 (4.46 - 27.7)		29.8 (12 - 90.7)		15 (8.77 - 29)		11.7 (6.92 - 18.8)
	12(13)-Ep-9-KODE	4.49 (2.59 - 7.27)		9.2 (2.81 - 32.3)		4.27 (2.37 - 6.38)		2.46 (1.06 - 5.59)
	15-KETE	0.868 (0.169 - 1.97)		1.13 (0.677 - 2.43)		0.785 (0.453 - 1.73)		0.933 (0.305 - 1.68)
	5-KETE	5.03 (1.6 - 16.5)		5.32 (2.52 - 22.7)		4.61 (2.01 - 12.9)		3.38 (1.42 - 6.09)
		Ibuprofen
	13-KODE	9.82 (5.45 - 25.9)	---	11.3 (5.62 - 44.7)	---	11.1 (5.11 - 44.2)	---	8.62 (3.27 - 25.1)	---
	9-KODE	17.6 (9.07 - 50.1)	---	21.7 (11.4 - 77.7)	---	18.1 (11.4 - 102)	---	11.1 (6.58 - 25.5)	---
	12(13)-Ep-9-KODE	5.16 (2.27 - 12.2)	---	4.49 (2.32 - 19.8)	+	5.36 (2.08 - 38.6)	---	2.77 (1.64 - 5.03)	---
	15-KETE	1.06 (0.49 - 2.01)	---	0.986 (0.66 - 2.87)	---	1.22 (0.667 - 2.94)	---	0.959 (0.389 - 2.43)	---
	5-KETE	7.03 (3.12 - 9.76)	---	6.1 (2.69 - 13.5)	---	7.81 (4.79 - 18.5)	---	6.19 (1.14 - 12.5)	†
	Results are reported as Geometric Means (Ranges) of n=8/group. Treatment differences in means were determined by 2-tailed t-tests after transformation to normality. Differences are indicated at p<0.1 (+), p<0.05 †), p<0.01 (‡).

## Sheet: Plasma MAGNAs
	Plasma Monoacylglycerols and Acylethanolamides, and Acylglycine Concentrations (nM)
		Day 0		Day 3		Day 7		Day 10
		Control
	1-OG	291 (78.4 - 934)		1200 (558 - 1590)		667 (242 - 1600)		680 (173 - 2760)
	2-OG	47.9 (15 - 159)		189 (94.8 - 264)		107 (36.1 - 274)		116 (29.1 - 373)
	1-LG	413 (93.5 - 1090)		1270 (805 - 1910)		745 (419 - 1380)		427 (123 - 1590)
	2-LG	101 (20.6 - 279)		308 (194 - 462)		176 (103 - 322)		110 (34.2 - 362)
	1-AG	69.4 (36 - 119)		106 (73.8 - 160)		72.7 (42.3 - 111)		89.7 (52.6 - 138)
	2-AG	10.7 (5.62 - 18.9)		16.8 (11.3 - 25.9)		11 (6.08 - 17.6)		13.1 (7.53 - 23)
	OEA	53.4 (40.8 - 65.4)		52.8 (43.5 - 72)		47 (26.7 - 69.9)		37.1 (20.8 - 56.9)
	LEA	2.91 (2.49 - 3.48)		3.48 (2.47 - 4.63)		3.24 (2.14 - 4.65)		3.21 (2.44 - 4.28)
	AEA	0.391 (0.341 - 0.432)		0.398 (0.321 - 0.466)		0.452 (0.26 - 0.701)		0.487 (0.433 - 0.579)
	DEA	0.298 (0.223 - 0.418)		0.347 (0.307 - 0.42)		0.388 (0.327 - 0.5)		0.346 (0.239 - 0.428)
	NO-Gly	11.5 (9.58 - 15.9)		15.2 (10.3 - 21)		12.5 (4.96 - 20.2)		11.4 (6.7 - 19.1)
	NA-Gly	0.563 (0.359 - 0.82)		0.825 (0.413 - 1.54)		0.804 (0.5 - 1.91)		0.688 (0.327 - 2.2)
		Ibuprofen
	1-OG	575 (204 - 2610)	---	647 (325 - 1120)	‡	688 (411 - 1490)	---	643 (360 - 1730)	---
	2-OG	89.2 (32.8 - 394)	---	99 (39.8 - 187)	‡	111 (73.1 - 215)	---	109 (55.7 - 309)	---
	1-LG	716 (184 - 2770)	---	758 (406 - 1380)	†	786 (528 - 1240)	---	427 (178 - 1060)	---
	2-LG	178 (43.7 - 760)	---	184 (93.1 - 368)	†	197 (146 - 301)	---	105 (46 - 267)	---
	1-AG	119 (93.1 - 234)	†	87.9 (59.3 - 187)	---	67.5 (35.4 - 145)	---	70.4 (33.6 - 174)	---
	2-AG	17.5 (13.7 - 35.7)	+	12.7 (7.46 - 27.7)	---	10.9 (4.87 - 18.5)	---	10.3 (5.4 - 22.2)	---
	OEA	52 (32.4 - 67)	---	56.2 (39 - 79)	---	61.5 (39.4 - 121)	---	34.5 (24.2 - 68.7)	---
	LEA	2.87 (2.15 - 3.85)	---	3.71 (2.83 - 4.36)	---	4.02 (2.74 - 6.58)	---	3.26 (2.16 - 6.63)	---
	AEA	0.391 (0.326 - 0.511)	---	0.391 (0.323 - 0.523)	---	0.54 (0.293 - 0.849)	---	0.428 (0.308 - 0.551)	---
	DEA	0.281 (0.213 - 0.345)	---	0.333 (0.215 - 0.464)	---	0.386 (0.277 - 0.594)	---	0.327 (0.267 - 0.535)	---
	NO-Gly	10.6 (8.6 - 16.8)	---	15.5 (8.07 - 22.4)	---	15.7 (8.74 - 24.4)	---	11.4 (6.86 - 22.8)	---
	NA-Gly	0.581 (0.397 - 1.12)	---	0.962 (0.454 - 3.71)	---	0.907 (0.364 - 1.42)	---	0.569 (0.202 - 1.32)	---
	Results are reported as Geometric Means (Ranges) of n=8/group. Treatment differences in means were determined by 2-tailed t-tests after transformation to normality. Differences are indicated at p<0.1 (+), p<0.05 †), p<0.01 (‡).
